# Supplementary material for: Performance Assessment of Self-Healing Polymer-Modified Bitumens by Evaluating the Suitability of Current Failure Definition, Failure Criterion, and Fatigue-Restoration Criteria
Source: MDPI journal article supplement (doi:10.3390/ma16062488), 2023-03-21
Supplement: s1 [file s1]

Supplementary files

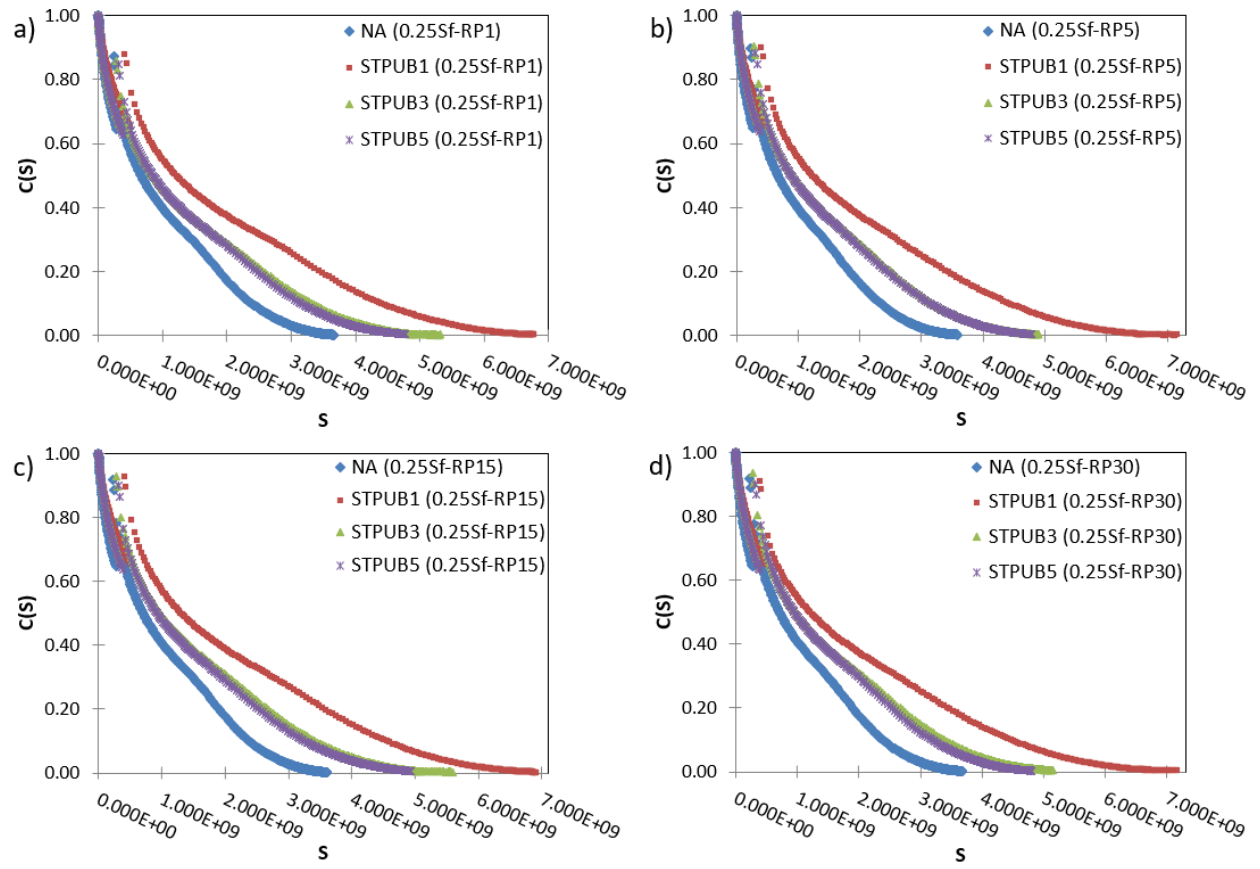

**Figure S1.** DCCs related to all bitumens at 25% of  $S_f$ : (a) RP1; (b) RP5; (c) RP15; (d) RP30.

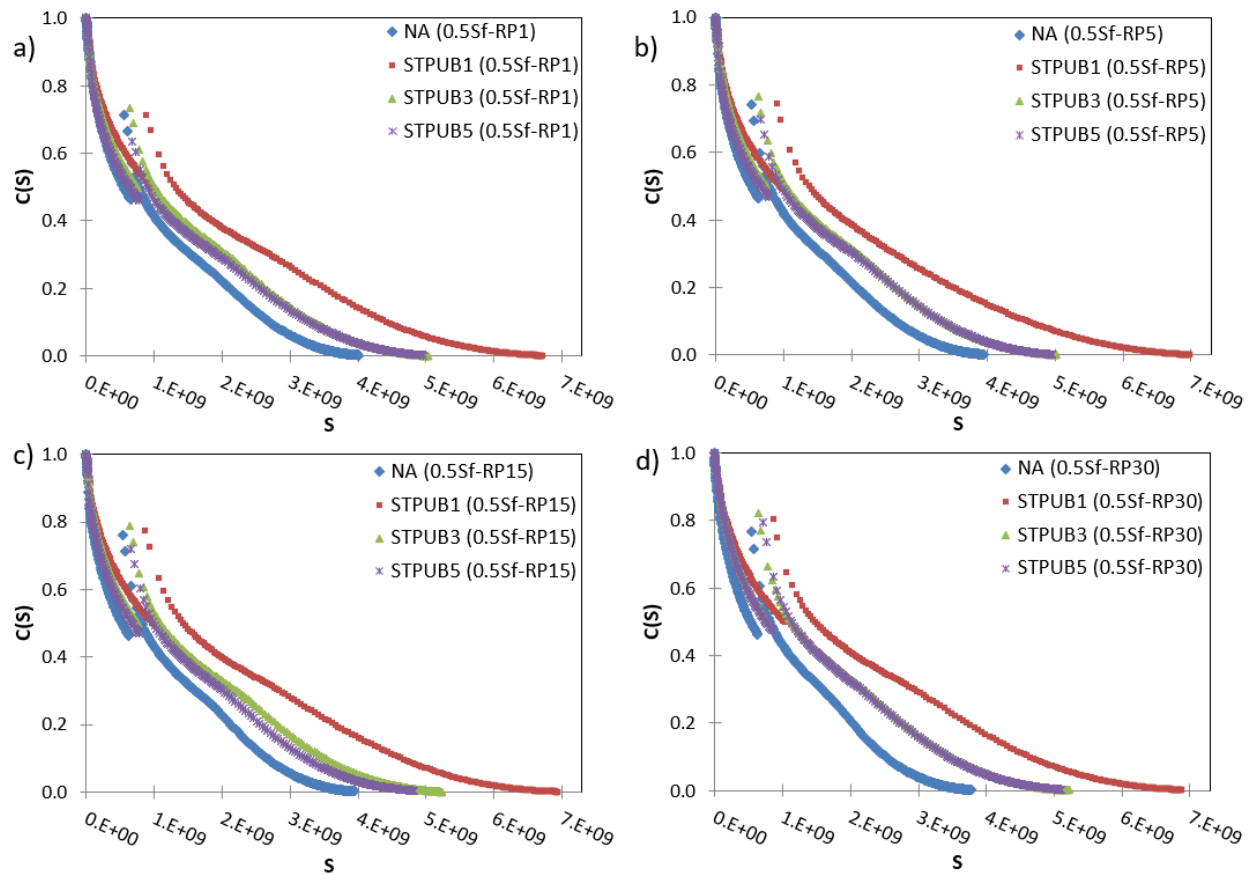

**Figure S2.** DCCs related to all bitumens at 50% of  $S_f$ : (a) RP1; (b) RP5; (c) RP15; (d) RP30.

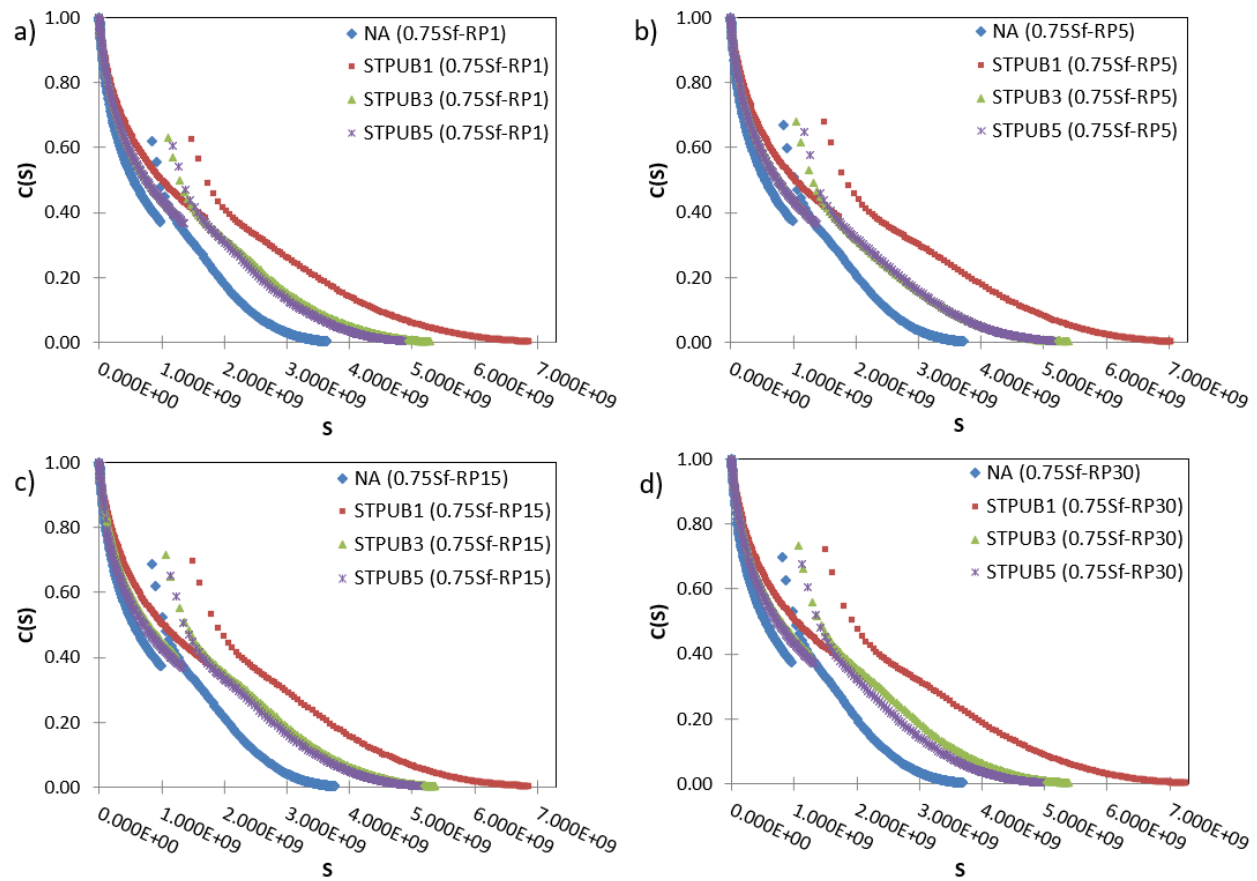

**Figure S3.** DCCs related to all bitumens at 75% of  $S_f$ : (a) RP1; (b) RP5; (c) RP15; (d) RP30.

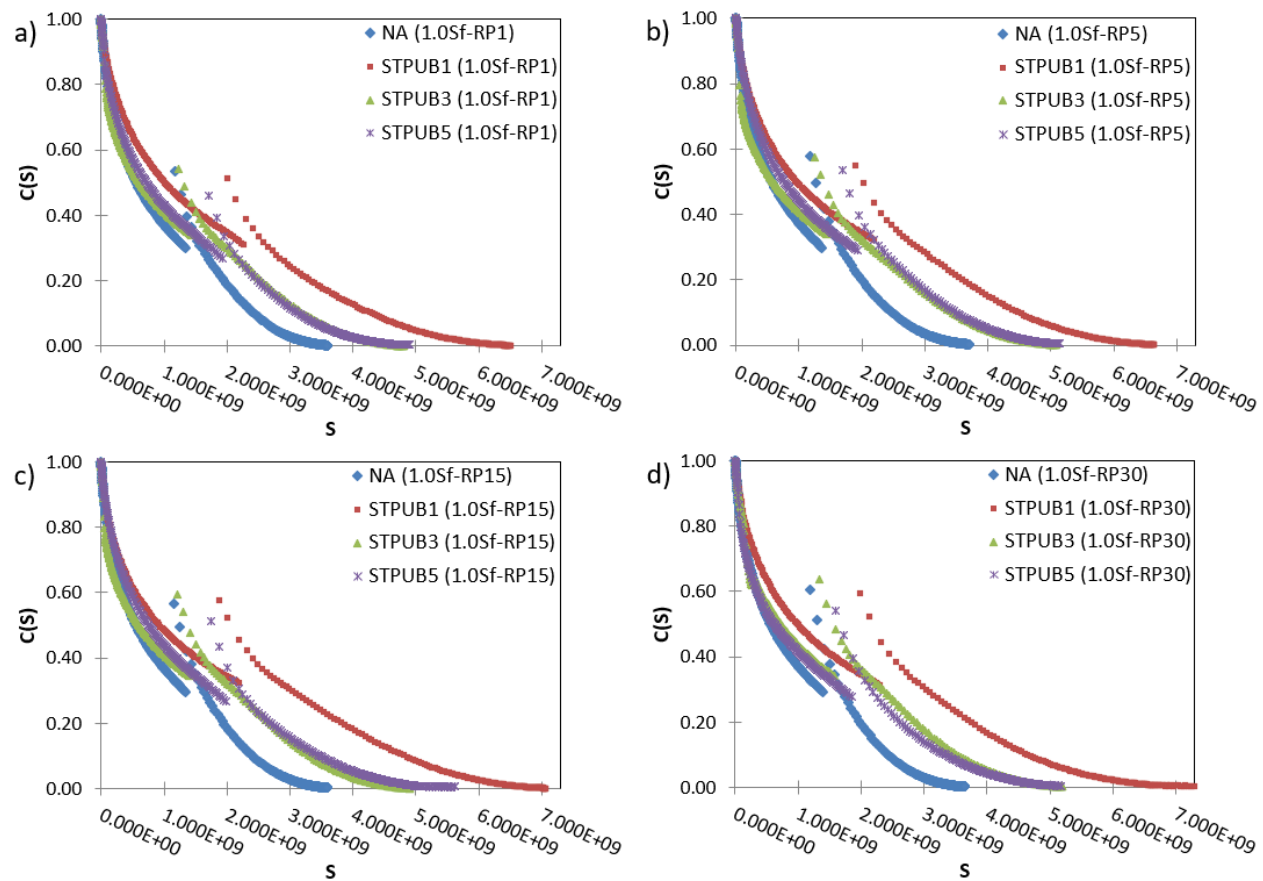

**Figure S4.** DCCs related to all bitumens at 100% of  $S_f$ : (a) RP1; (b) RP5; (c) RP15; (d) RP30.

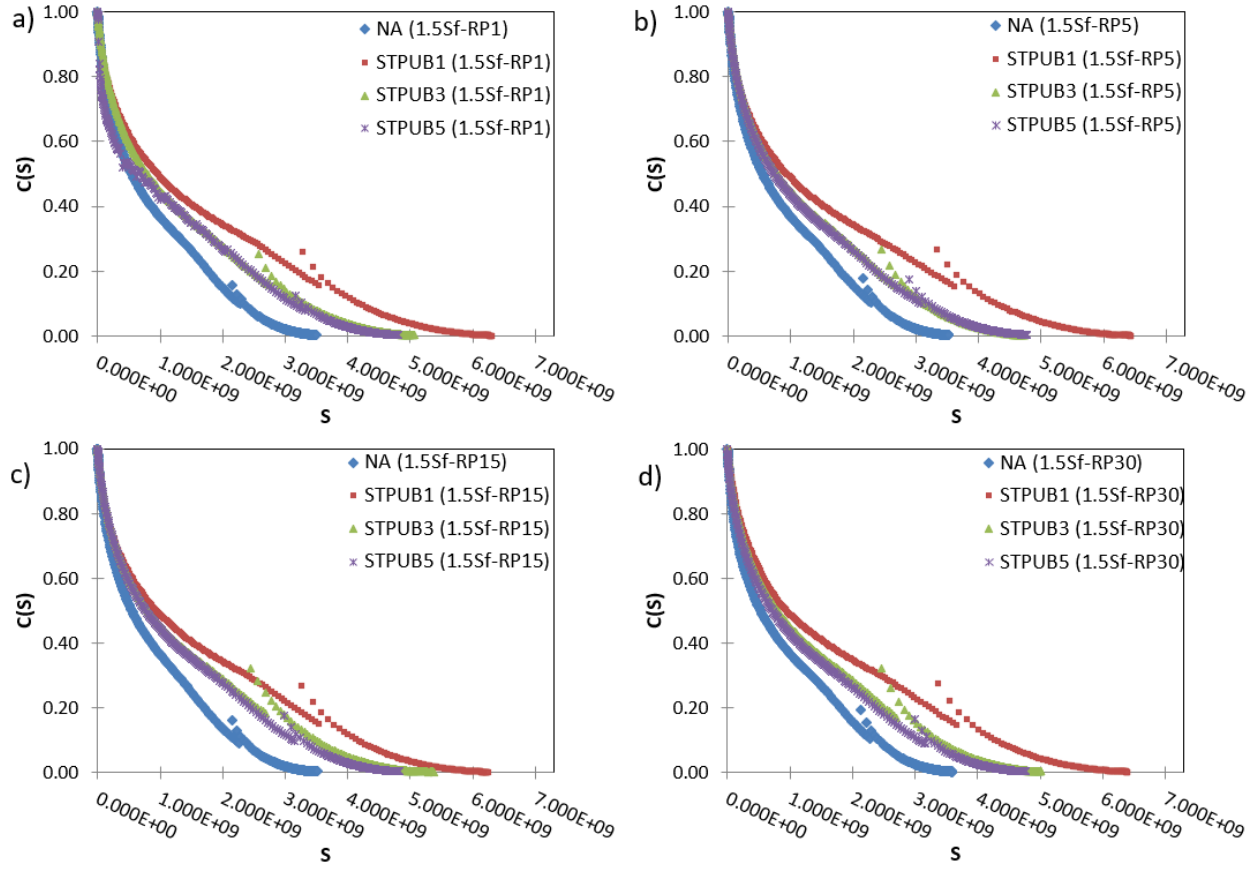

**Figure S5.** DCCs related to all bitumens at 150% of  $S_f$ : (a) RP1; (b) RP5; (c) RP15; (d) RP30.
